# Supplementary material for: Study on the diagnostic potential and molecular mechanism of hsa_circ_0000831 in oral squamous cell carcinoma
Source: PeerJ. 2025 Sep 29;13:e20082. doi: 10.7717/peerj.20082 (PMC12490516; doi:10.7717/peerj.20082)
Supplement: Supplemental Information 1 [file peerj-13-20082-s001.xls]

## Sheet: Sheet1
ITEM TO CHECK	IMPORTANCE	CHECKLIST
EXPERIMENTAL DESIGN
Definition of experimental and control groups	E	Page4line170-173
Number within each group	E	Page4line170-173
Assay carried out by core lab or investigator's lab?	D	Not Applicable
Acknowledgement of authors' contributions	D	Not Applicable
SAMPLE
Description	E	Page4-5line170-178
Volume/mass of sample processed	D	Not Applicable
Microdissection or macrodissection	E	Page4-5line170-178
Processing procedure	E	Page4-5line170-178
If frozen - how and how quickly?	E	Page4-5line170-178
If fixed - with what, how quickly?	E	Page4-5line170-178
Sample storage conditions and duration (especially for FFPE samples)	E	Page4-5line170-178
NUCLEIC ACID EXTRACTION
Procedure and/or instrumentation	E	Page3line97-119
Name of kit and details of any modifications	E	Page3line97-119
Source of additional reagents used	D	Not Applicable
Details of DNase or RNAse treatment	E	Page3line97-119
Contamination assessment (DNA or RNA)	E	Page3line97-119
Nucleic acid quantification	E	Page3line97-119
Instrument and method	E	Page3line97-119
Purity (A260/A280)	D	Not Applicable
Yield	D	Not Applicable
RNA integrity method/instrument	E	Page3line97-119
RIN/RQI or Cq of 3' and 5' transcripts	E	Page3line97-119
Electrophoresis traces	D	Not Applicable
Inhibition testing (Cq dilutions, spike or other)	E	Page3line97-119
REVERSE TRANSCRIPTION
Complete reaction conditions	E	Page3line97-119
Amount of RNA and reaction volume	E	Page3line97-119
Priming oligonucleotide (if using GSP) and concentration	E	Page3line97-119
Reverse transcriptase and concentration	E	Page3line97-119
Temperature and time	E	Page3line97-119
Manufacturer of reagents and catalogue numbers	D	Not Applicable
Cqs with and without RT	D*	Not Applicable
Storage conditions of cDNA	D	Not Applicable
qPCR TARGET INFORMATION
If multiplex, efficiency and LOD of each assay.	E	Page5line180-196
Sequence accession number	E	Page5line180-196
Location of amplicon	D	Not Applicable
Amplicon length	E	Page5line180-196
In silico specificity screen (BLAST, etc)	E	Page5line180-196
Pseudogenes, retropseudogenes or other homologs?	D	Not Applicable
Sequence alignment	D	Not Applicable
Secondary structure analysis of amplicon	D	Not Applicable
Location of each primer by exon or intron (if applicable)	E	Page5line180-196
What splice variants are targeted?	E	Page5line180-196
qPCR OLIGONUCLEOTIDES
Primer sequences	E	Page5line180-196
RTPrimerDB Identification Number	D	Not Applicable
Probe sequences	D**	Not Applicable
Location and identity of any modifications	E	Page5line180-196
Manufacturer of oligonucleotides	D	Not Applicable
Purification method	D	Not Applicable
qPCR PROTOCOL
Complete reaction conditions	E	Page5line180-196
Reaction volume and amount of cDNA/DNA	E	Page5line180-196
Primer, (probe), Mg++ and dNTP concentrations	E	Page5line180-196
Polymerase identity and concentration	E	Page5line180-196
Buffer/kit identity and manufacturer	E	Page5line180-196
Exact chemical constitution of the buffer	D	Not Applicable
Additives (SYBR Green I, DMSO, etc.)	E	Page5line180-196
Manufacturer of plates/tubes and catalog number	D	Not Applicable
Complete thermocycling parameters	E	Page5line180-196
Reaction setup (manual/robotic)	D	Not Applicable
Manufacturer of qPCR instrument	E	Page5line180-196
qPCR VALIDATION
Evidence of optimisation (from gradients)	D	Not Applicable
Specificity (gel, sequence, melt, or digest)	E	Page5line180-196
For SYBR Green I, Cq of the NTC	E	Page5line180-196
Standard curves with slope and y-intercept	E	Page5line180-196
PCR efficiency calculated from slope	E	Page5line180-196
Confidence interval for PCR efficiency or standard error	D	Not Applicable
r2 of standard curve	E	Page5line180-196
Linear dynamic range	E	Page5line180-196
Cq variation at lower limit	E	Page5line180-196
Confidence intervals throughout range	D	Not Applicable
Evidence for limit of detection	E	Page5line180-196
If multiplex, efficiency and LOD of each assay.	E	Page5line180-196
DATA ANALYSIS
qPCR analysis program (source, version)	E	Page5line180-196
Cq method determination	E	Page5line180-196
Outlier identification and disposition	E	Page5line180-196
Results of NTCs	E	Page5line180-196
Justification of number and choice of reference genes	E	Page5line180-196
Description of normalisation method	E	Page5line180-196
Number and concordance of biological replicates	D	Not Applicable
Number and stage (RT or qPCR) of technical replicates	E	Page5line180-196
Repeatability (intra-assay variation)	E	Page5line180-196
Reproducibility (inter-assay variation, %CV)	D	Not Applicable
Power analysis	D	Not Applicable
Statistical methods for result significance	E	Page6line237-243
Software (source, version)	E	Page6line237-243
Cq or raw data submission using RDML	D	Not Applicable
Table 1. MIQE checklist for authors, reviewers and editors. All essential information (E) must be submitted with the manuscript. Desirable
information (D) should be submitted if available. If using primers obtained from RTPrimerDB, information on qPCR target, oligonucleotides,
protocols and validation is available from that source.
*: Assessing the absence of DNA using a no RT assay is essential when first extracting RNA. Once the sample has been validated as
RDNA-free, inclusion of a no-RT control is desirable, but no longer essential.
**: Disclosure of the probe sequence is highly desirable and strongly encouraged. However, since not all commercial pre-designed assay
vendors provide this information, it cannot be an essential requirement. Use of such assays is advised against.
